# Supplementary material for: Naphthalimide based smart sensor for CN−/Fe3+ and H2S. Synthesis and application in RAW264.7 cells and zebrafish imaging
Source: Royal Society of Chemistry journal article supplement (doi:10.1039/c9ra07998j), 2020-01-01
Supplement: c9ra07998j1.pdf [file c9ra07998j1.pdf]

# Naphthalimide based Smart Sensor for $\text{CN}^-/\text{Fe}^{3+}$ and $\text{H}_2\text{S}$ . Synthesis and Application in RAW264.7 cell and Zebrafish Imaging

Sanay Naha<sup>a</sup>, Shu-Pao Wu<sup>b\*</sup>, and Sivan Velmathi<sup>a\*</sup>

<sup>a</sup>Organic and Polymer Synthesis Laboratory, Department of Chemistry, National Institute of Technology, Tiruchirappalli, India

<sup>b</sup>Department of Applied Chemistry, National Chiao Tung University, Hsinchu, Taiwan.

Email: [velmathis@nitt.edu](mailto:velmathis@nitt.edu), [spwu@mail.nctu.edu.tw](mailto:spwu@mail.nctu.edu.tw)

## Content of Supporting Information:

**Fig. S1:** IR-spectrum of receptor R.

**Fig. S2:**  $^1\text{H}$ -NMR spectrum of receptor R in  $\text{DMSO-d}_6$ .

**Fig. S3:**  $^{13}\text{C}$ -NMR spectrum of receptor R in  $\text{DMSO-d}_6$ .

**Fig. S4:** HR-Mass spectrum of receptor R.

**Fig. S5:** Solvent effect on receptor and its cyanide sensing.

**Fig. S6:** Images of anion selectivity and UV-PL spectrum in only DMSO solvent.

**Fig. S7:** Effect of water content in cyanide selectivity by receptor.

**Fig. S8:** **Fig. S8:** (a) Naked eye colour change and (b) under UV-light turn-on emission for  $\text{CN}^-$  among  $\text{CN}^-$ ,  $\text{NO}_2^-$ ,  $\text{S}^{2-}$ ,  $\text{ClO}^-$ , and  $\text{HSO}_3^-$  in 5% water-DMSO medium; (c) Electronic and (d) emission spectra for optical selectivity of  $\text{CN}^-$ ; (e) Naked eye image and (f) electronic spectrum of the of receptor R with  $\text{S}_2\text{O}_4^{2-}$ ,  $\text{HSO}_3^-$  and  $\text{HSO}_4^-$ .

**Fig. S9:** Interference studies for cyanide sensing by receptor against competing anions.

**Fig. S10:** (a) Job's plot of  $\text{CN}^-$  detection by receptor and (b) Job's plot of  $\text{Fe}^{3+}$  detection by receptor +  $\text{CN}^-$ .

**Fig. S11:** (a) Binding constant and (b) Limit of detection of  $\text{CN}^-$  by receptor R.

**Fig. S12:** (a) Binding constant and (b) Limit of detection of  $\text{Fe}^{3+}$  by R+ $\text{CN}^-$ .

**Fig. S13:** Limit of detection of  $\text{H}_2\text{S}$  by receptor R.

**Fig. 14:** Strip Test for  $\text{CN}^-$  (a) Under UV-Light and naked eye response of the probe R with various concentration of  $\text{CN}^-$  ranging from (0.1-10)  $\mu\text{M}$ ; Strip test for  $\text{H}_2\text{S}$  (b) Naked eye response of the probe R with various concentration of  $\text{H}_2\text{S}$  ranging from (0.1-10)  $\mu\text{M}$ .

**Table S1:** Comparison table of the reported receptors for  $\text{CN}^-$ ,  $\text{Fe}^{3+}$ , and  $\text{H}_2\text{S}$ .

**Table S2:** Quantum Yield of the  $\text{CN}^-/\text{Fe}^{3+}$  relay sensing process.

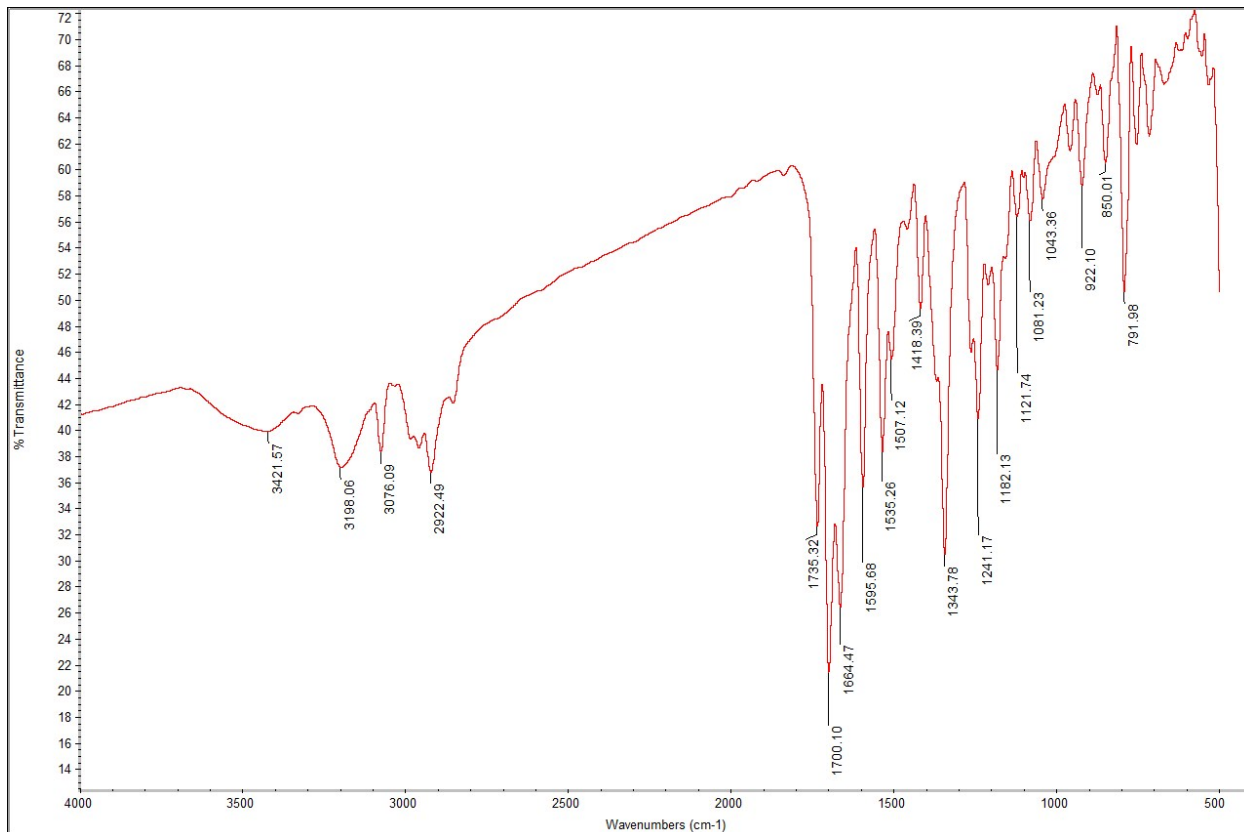

**Fig. S1:** IR-spectrum of receptor R.

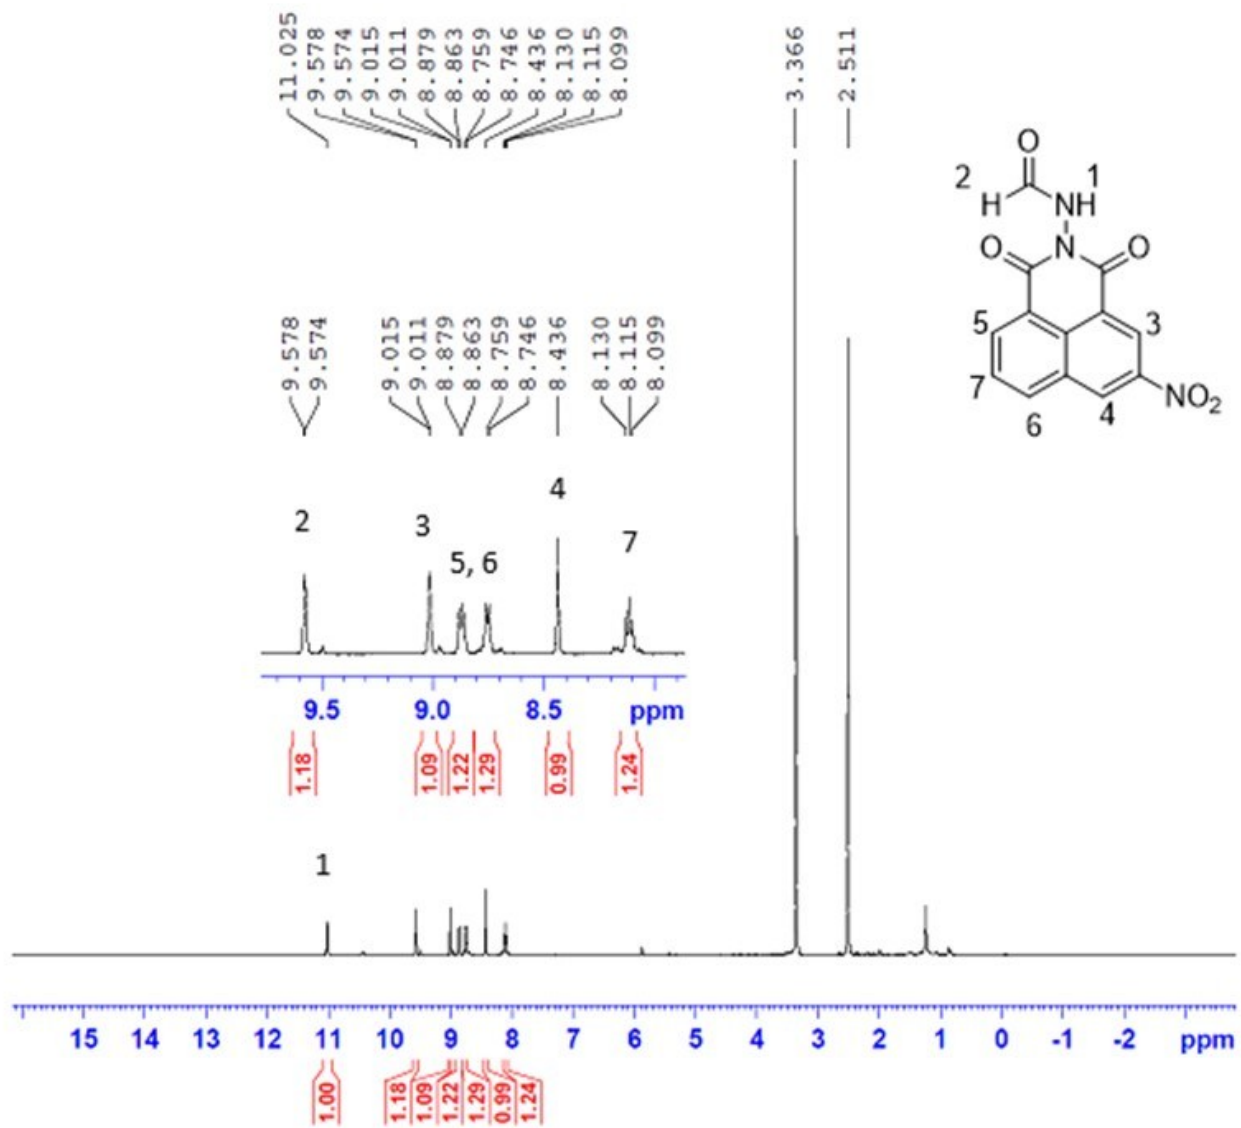

**Fig. S2:**  $^1\text{H-NMR}$  spectrum of receptor R in  $\text{DMSO-d}_6$ .

(a)

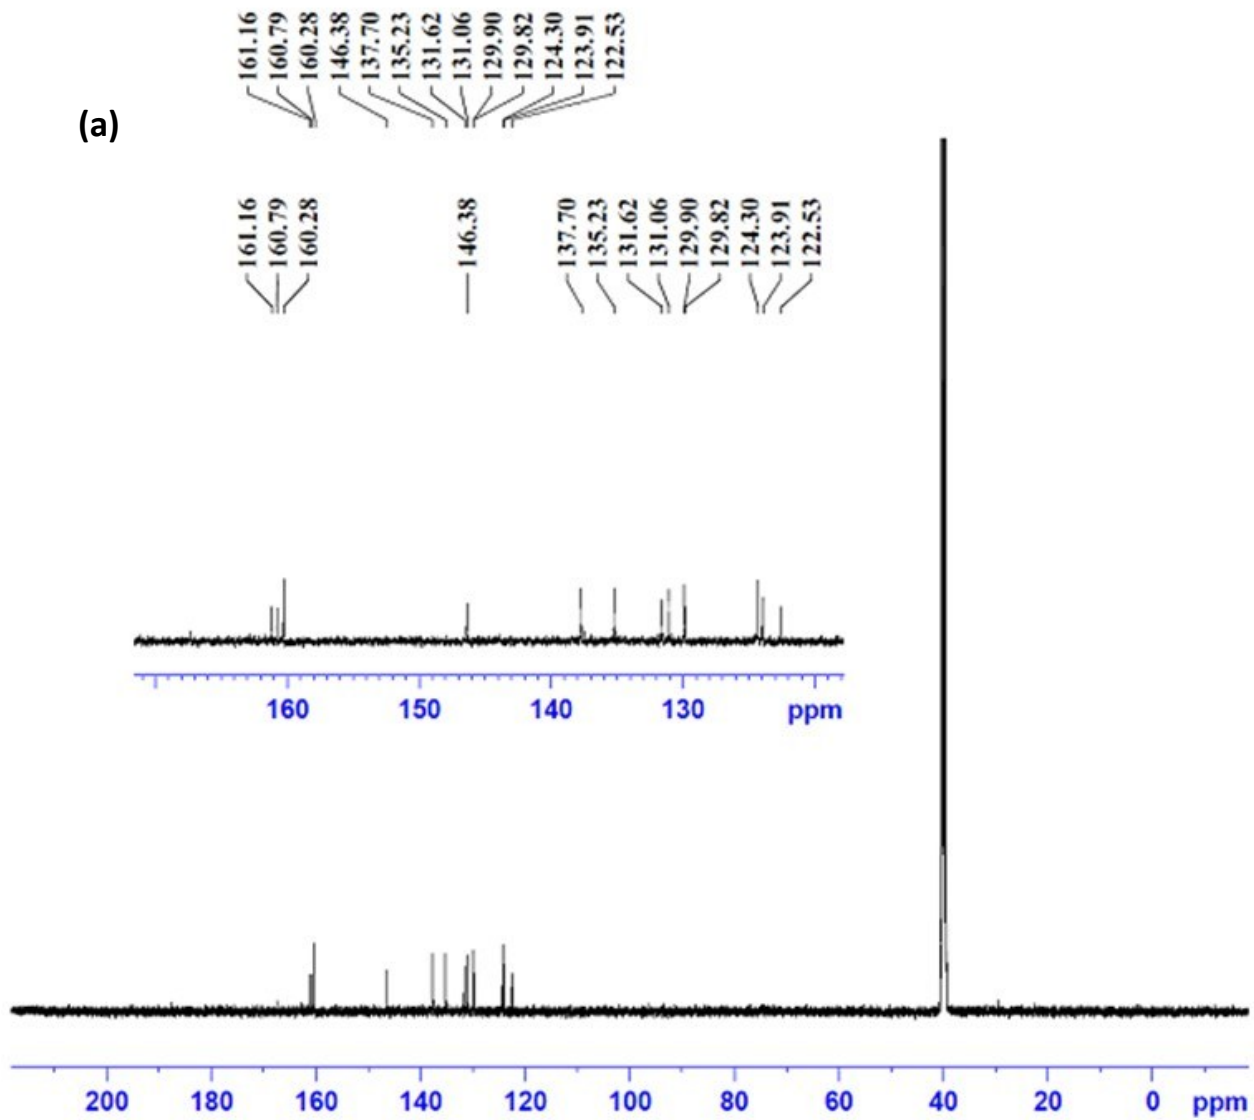

(b)

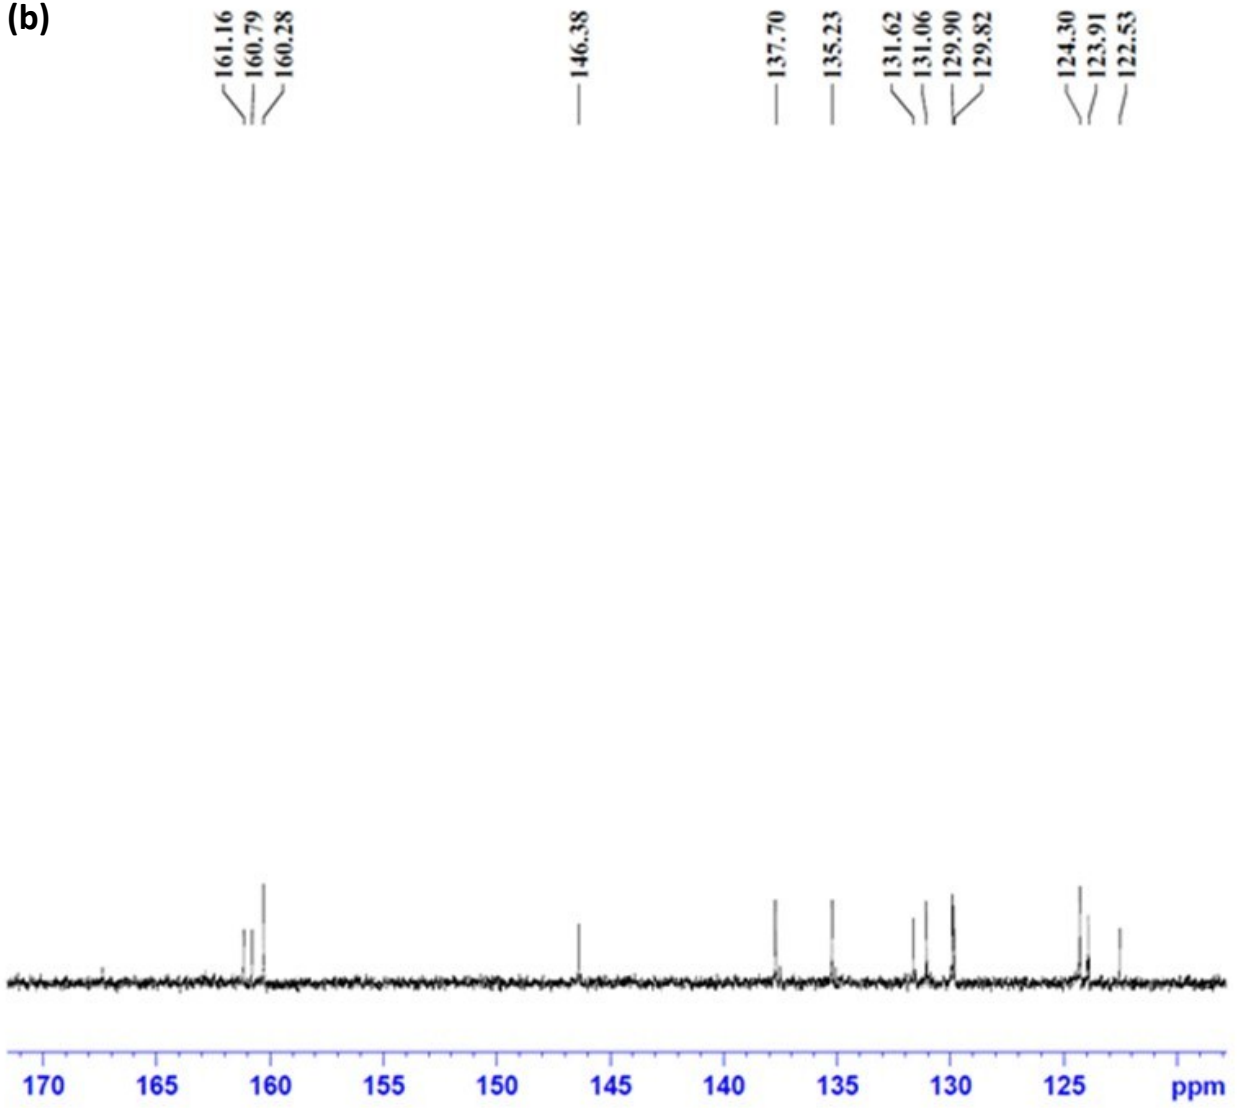

(c)

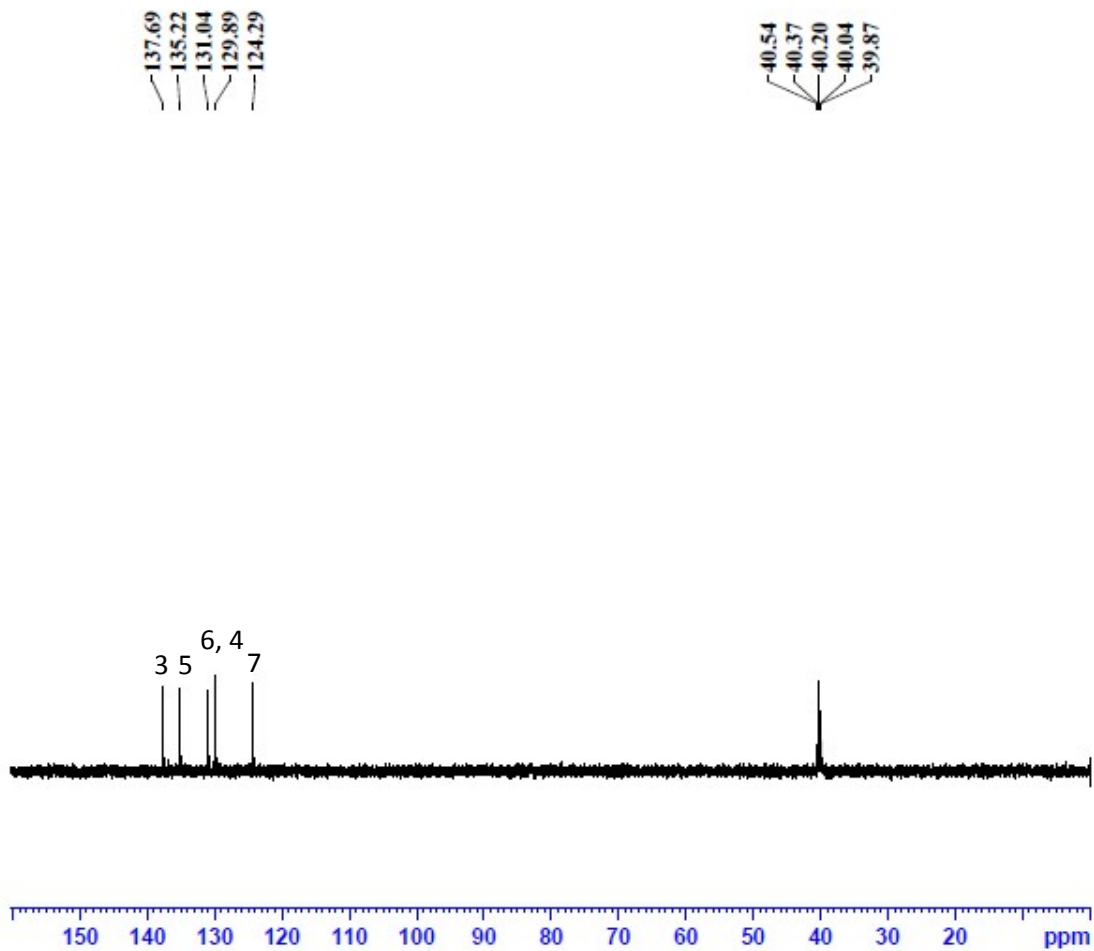

**Fig. S3:** (a)  $^{13}\text{C}$ -NMR spectrum of receptor R, (b) Expansion of  $^{13}\text{C}$ -NMR spectrum of the receptor R from 120 ppm to 180 ppm and (c)  $^{135}\text{DEPT}$ -NMR spectrum of the receptor R in  $\text{DMSO-d}_6$ .

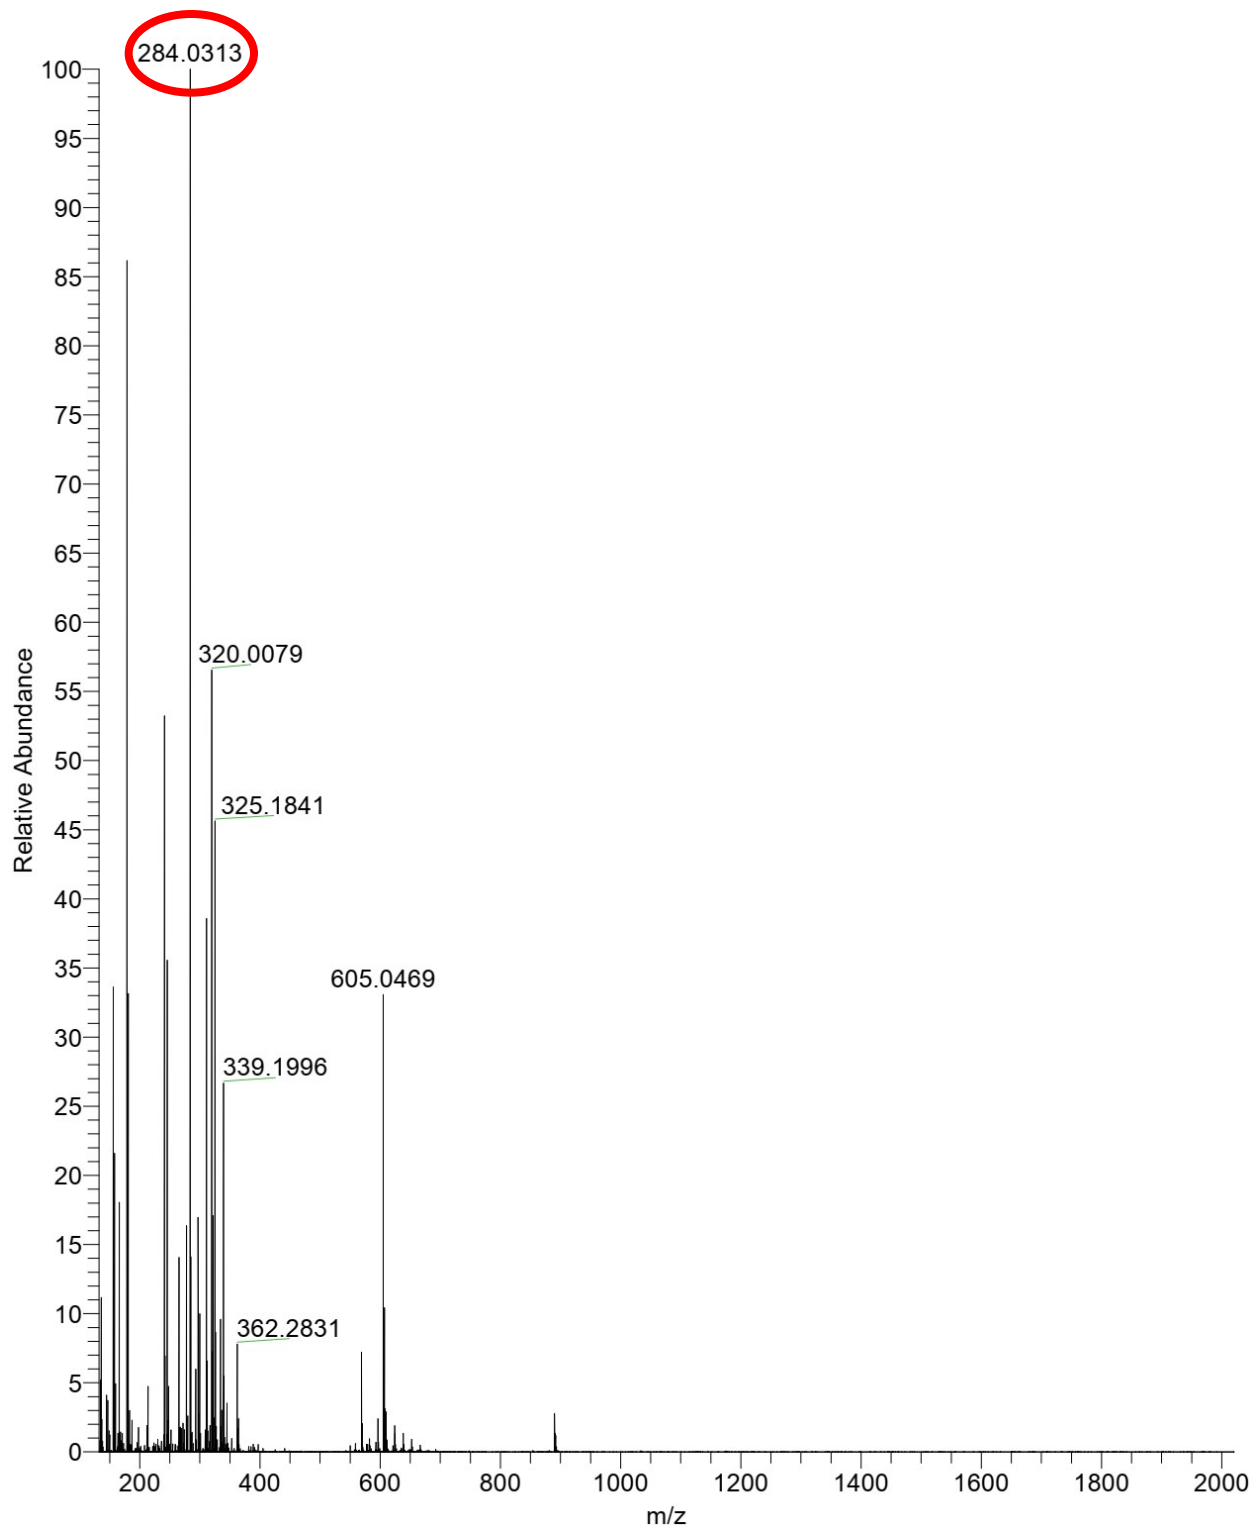

**Fig. S4:** HR-Mass spectrum of receptor R.

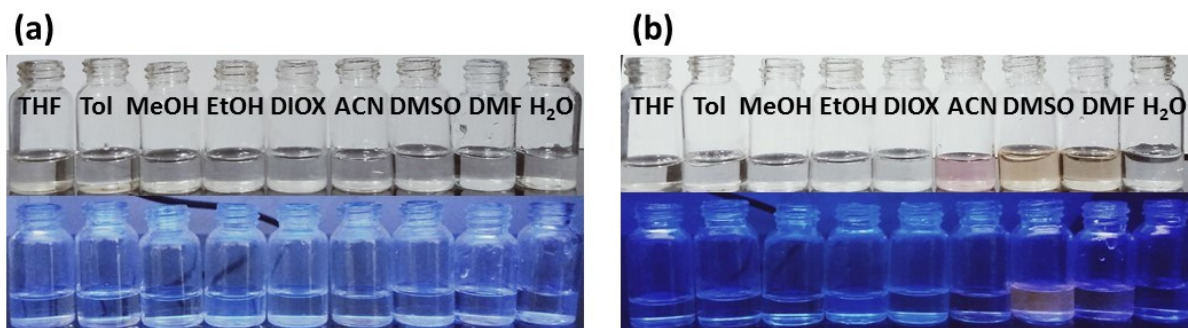

**Fig. S5:** Solvent effect on receptor and its cyanide sensing. (a) Naked eye and under UV light Images of only receptor and (b) naked eye and under UV light Images of receptor with cyanide in various solvents.

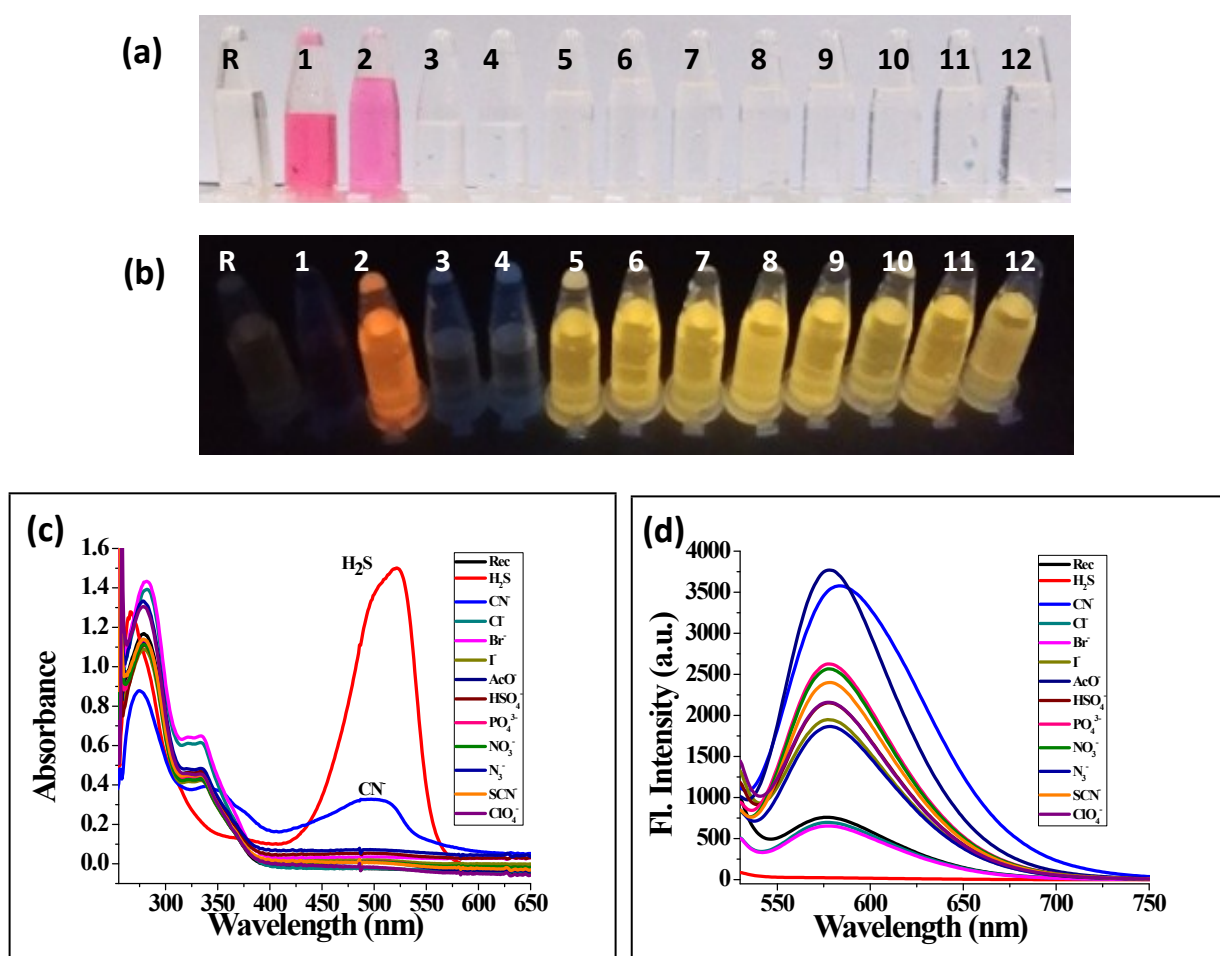

**Fig. S6:** Images of anion selectivity and UV-PL spectrum in only DMSO solvent. (a) Naked eye colour change and (b) under UV-light; (c) the electronic and (d) emission responses of the receptor with all anions in only DMSO solvent. Where 1= H<sub>2</sub>S, 2= CN<sup>-</sup>, 3= Cl<sup>-</sup>, 4= Br<sup>-</sup>, 5= I<sup>-</sup>, 6= AcO<sup>-</sup>, 7= HSO<sub>4</sub><sup>-</sup>, 8= PO<sub>4</sub><sup>3-</sup>, 9= NO<sub>3</sub><sup>-</sup>, 10= N<sub>3</sub><sup>-</sup>, 11= SCN<sup>-</sup>, and 12= ClO<sub>4</sub><sup>-</sup>.



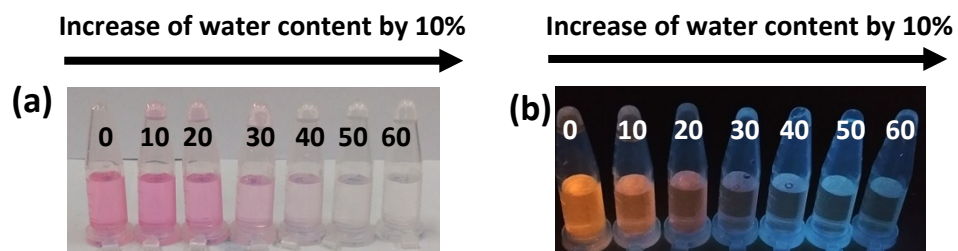

**Fig. S7:** Effect of water content in cyanide selectivity by receptor. (a) Naked eye and (b) under UV light images of water effect in cyanide response.

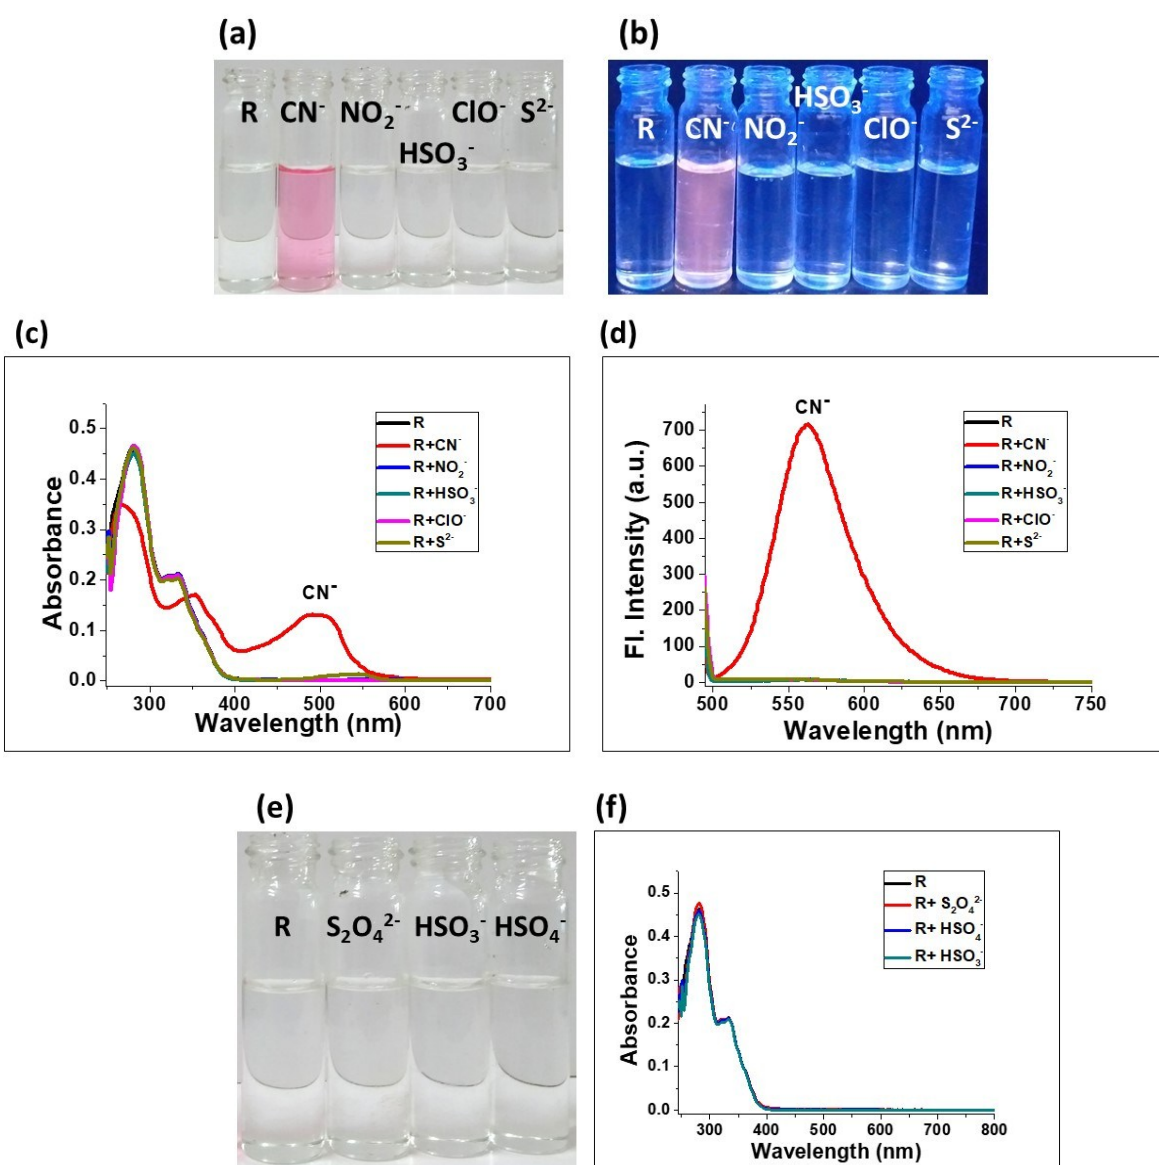

**Fig. S8:** (a) Naked eye colour change and (b) under UV-light turn-on emission for  $\text{CN}^-$  among  $\text{CN}^-$ ,  $\text{NO}_2^-$ ,  $\text{S}^{2-}$ ,  $\text{ClO}^-$ , and  $\text{HSO}_3^-$  in 5% water-DMSO medium; (c) Electronic and (d) emission spectra for optical selectivity of  $\text{CN}^-$ ; (e) Naked eye image and (f) electronic spectrum of the of receptor **R** with  $\text{S}_2\text{O}_4^{2-}$ ,  $\text{HSO}_3^-$  and  $\text{HSO}_4^-$ .

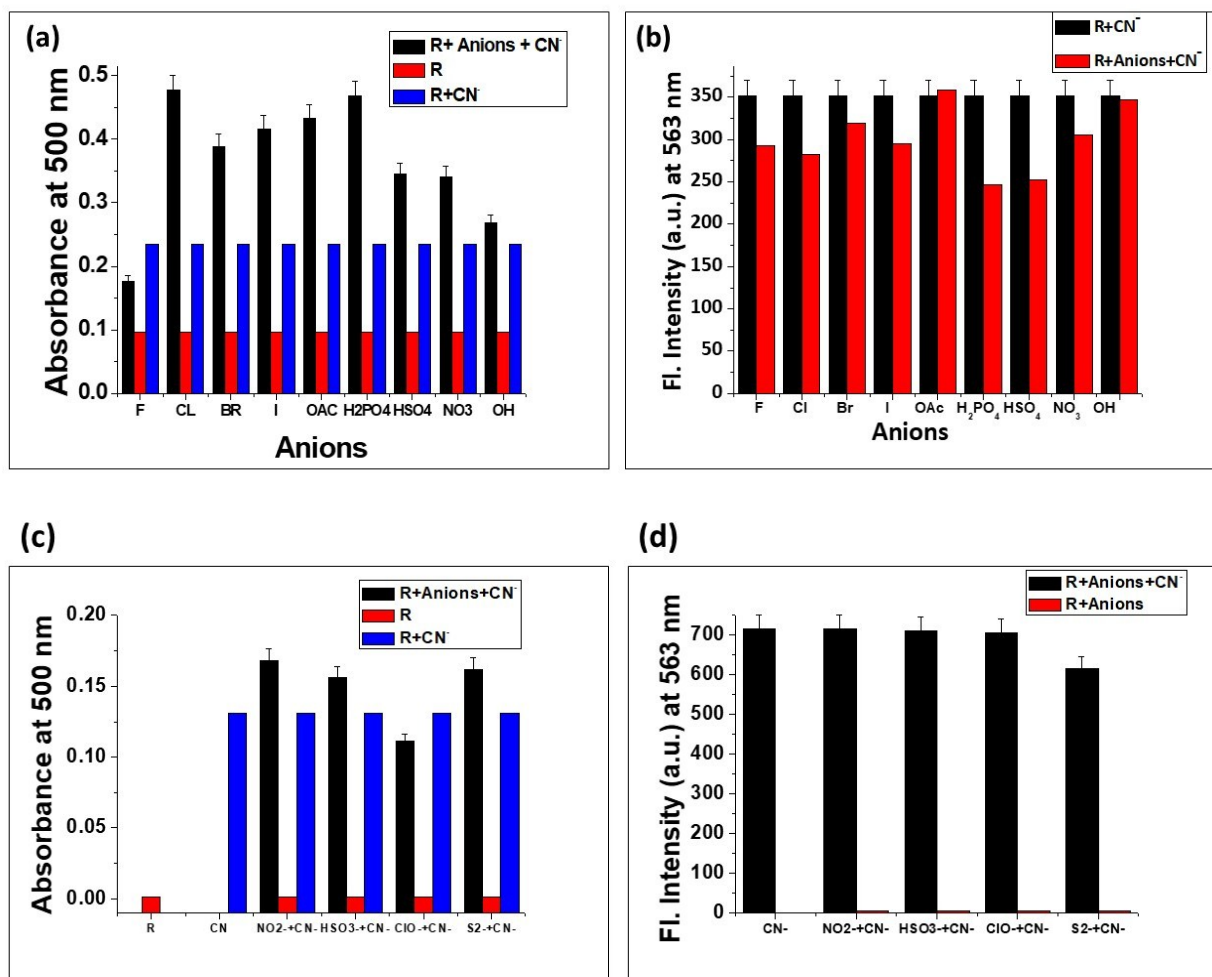

**Fig. S9:** Interference studies for cyanide sensing by receptor against competing anions. Comparison of (a) electronic response at 500 nm and (b) emission response at 563 nm in presence of other competing anions; (c) Electronic and (d) emission spectra for interference studies of the anions on cyanide selectivity among  $\text{CN}^-$ ,  $\text{NO}_2^-$ ,  $\text{S}^{2-}$ ,  $\text{ClO}^-$ , and  $\text{HSO}_3^-$ .

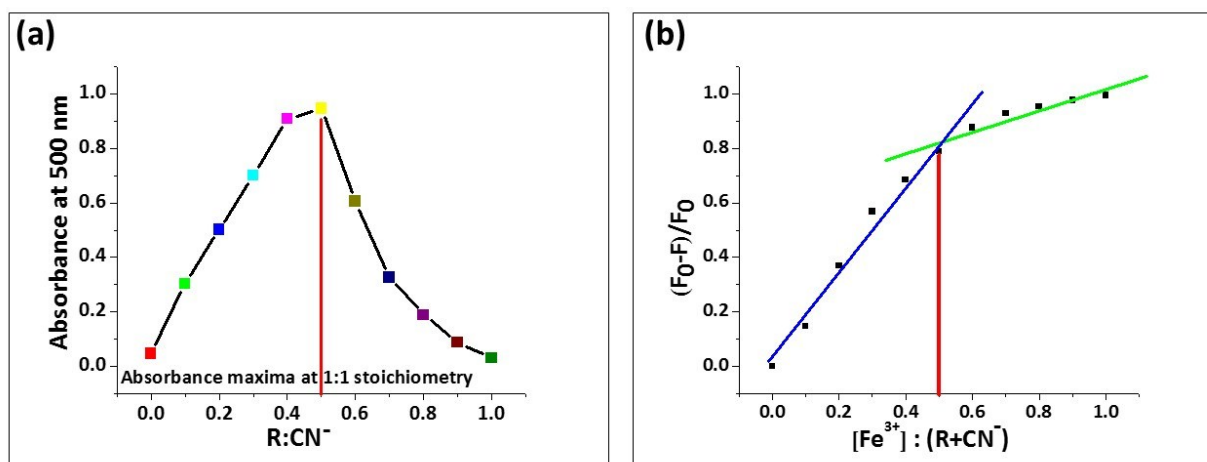

Fig. S10: (a) Job's plot of CN<sup>-</sup> detection by receptor and (b) Job's plot of Fe<sup>3+</sup> detection by receptor+CN<sup>-</sup>.

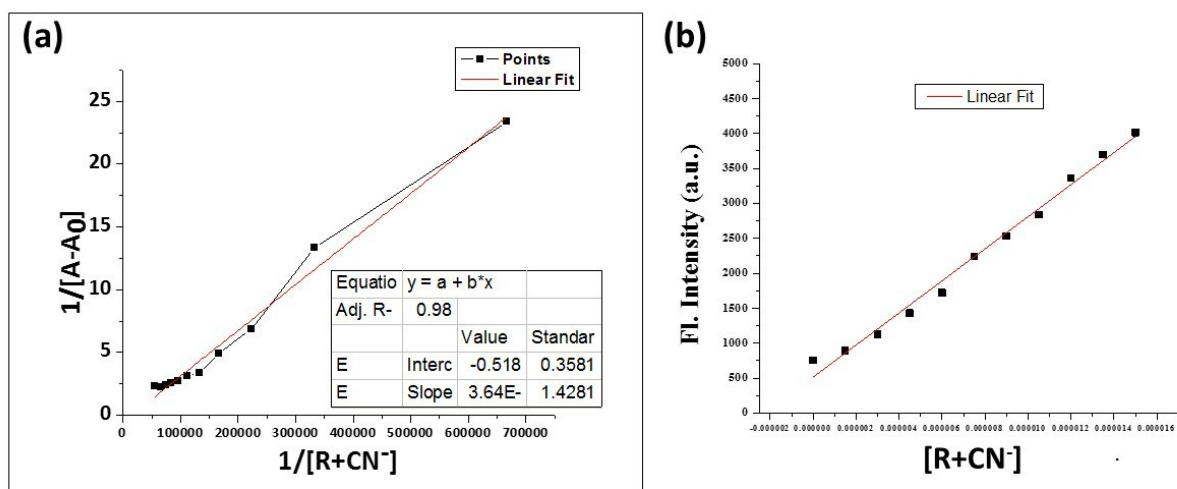

Fig. S11: (a) Binding constant and (b) Limit of detection of CN<sup>-</sup> by receptor R.

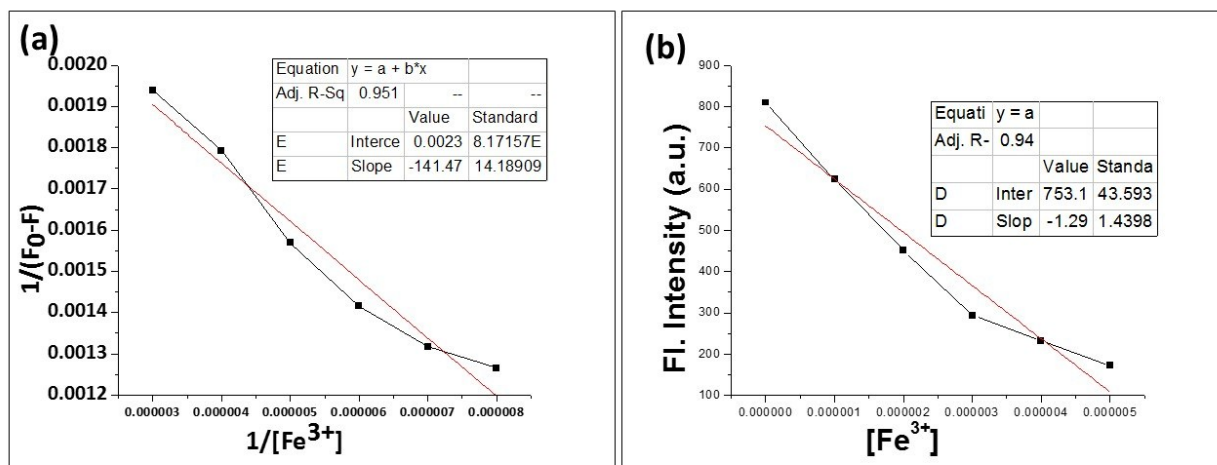

Fig. S12: (a) Binding constant and (b) Limit of detection of  $\text{Fe}^{3+}$  by  $\text{R}+\text{CN}^-$ .

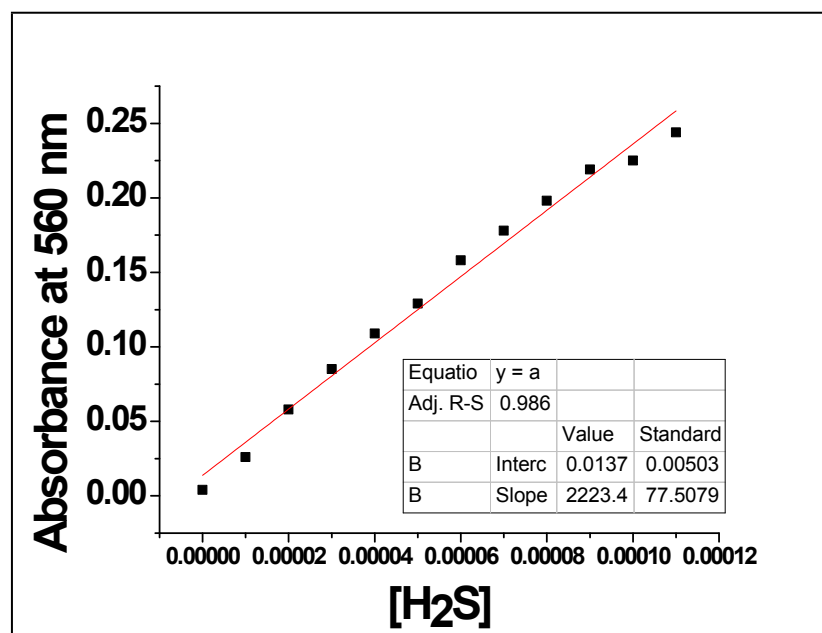

Fig. S13: Limit of detection of  $\text{H}_2\text{S}$  by receptor R.

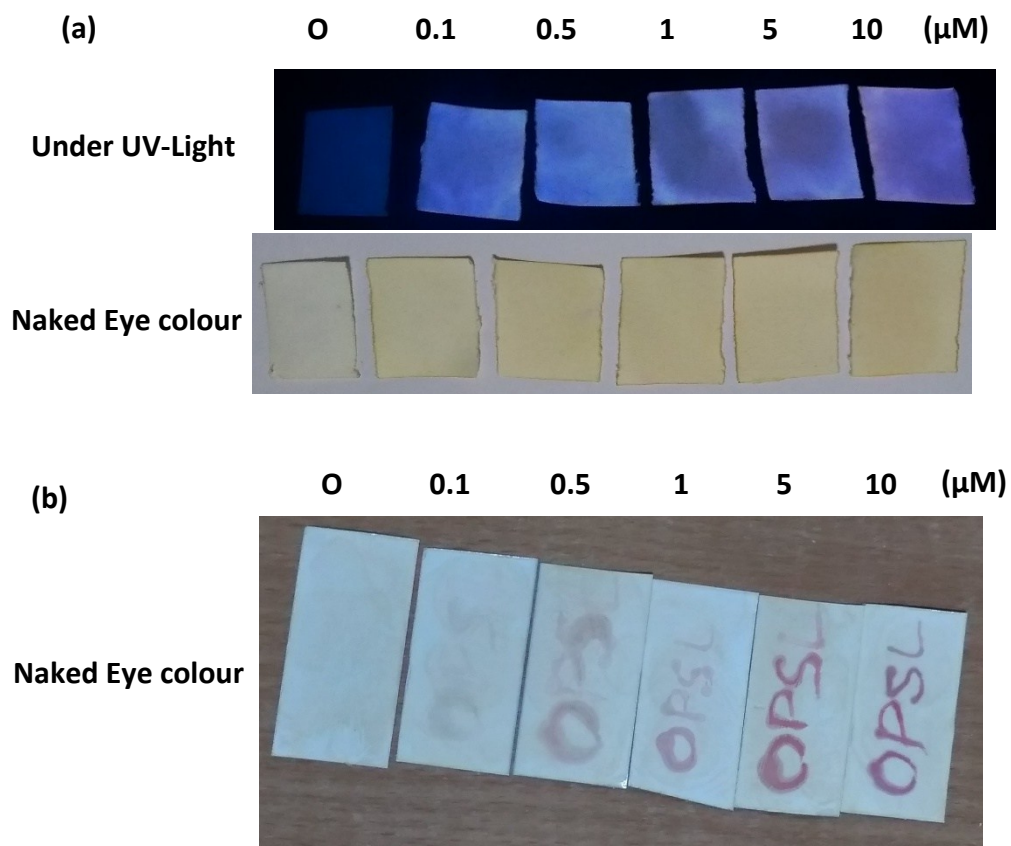

Fig. 14: Strip Test for  $\text{CN}^-$  (a) Under UV-Light and naked eye response of the probe R with various concentration of  $\text{CN}^-$  ranging from (0.1-10)  $\mu\text{M}$ ; Strip test for  $\text{H}_2\text{S}$  (b) Naked eye response of the probe R with various concentration of  $\text{H}_2\text{S}$  ranging from (0.1-10)  $\mu\text{M}$ .

**Table S1:** Comparison table of the reported receptors for  $\text{CN}^-$ ,  $\text{Fe}^{3+}$ , and  $\text{H}_2\text{S}$ .

| Ref. No. | Molecular Structure                                                                                                                          | Analytes                           | Detection limit                                                              | Solvent              | Sensing Mode          | Application    |
|----------|----------------------------------------------------------------------------------------------------------------------------------------------|------------------------------------|------------------------------------------------------------------------------|----------------------|-----------------------|----------------|
| 1.       | 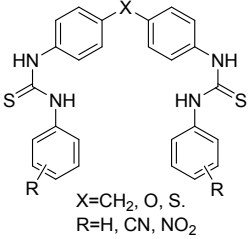 <p>X=CH<sub>2</sub>, O, S.<br/>R=H, CN, NO<sub>2</sub></p> | $\text{CN}^-$                      | 3.7 $\mu\text{M}$                                                            | THF-DMSO (99:1)      | Deprotonation         | KCN in Water   |
| 2.       |                                                             | $\text{CN}^-$                      | 14 nM                                                                        | DMF                  | Nucleophilic Reaction | —              |
| 3.       |                                                            | $\text{CN}^-$                      | —                                                                            | ACN                  | Deprotonation         | —              |
| 4.       |  <p>R=C<sub>6</sub>H<sub>13</sub></p>                     | $\text{Cu}^{2+}$ and $\text{CN}^-$ | 3.12 $\mu\text{M}$ ( $\text{Cu}^{2+}$ ), 2.5 $\mu\text{M}$ ( $\text{CN}^-$ ) | DMSO                 | Complexation          | TLC strip test |
| 6.       |                                                           | $\text{CN}^-$                      | 1.17 $\mu\text{M}$                                                           | HEPES buffered Water | Nucleophilic Reaction | —              |

|     |                                                                                                                                         |                 |          |                                  |                       |                                |
|-----|-----------------------------------------------------------------------------------------------------------------------------------------|-----------------|----------|----------------------------------|-----------------------|--------------------------------|
| 7.  | 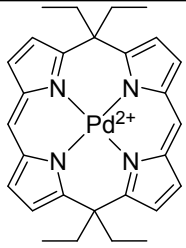                                                       | CN <sup>-</sup> | 0.3 μM   | ACN                              | Nucleophilic Reaction | _____                          |
| 8.  |                                                        | CN <sup>-</sup> | 21 nM    | EtOH-Tris<br>HCl buffer<br>(4:6) | Nucleophilic Reaction | strip test                     |
| 9.  |                                                       | CN <sup>-</sup> | 10 μM    | MeOH-<br>Water                   | Redox Reaction        | _____                          |
| 10. | <br>R1 => Ra, Rc=H, Rb=OH<br>R2 => Ra, Rc=t-Bu, Rb=H | CN <sup>-</sup> | 0.53 μM  | Water-<br>DMSO (6:4)             | Deprotonation         | CN <sup>-</sup> in Waste Water |
| 12. |                                                      | CN <sup>-</sup> | —        | DMSO-<br>Water (7:3)             | Deprotonation         | Strip test                     |
| 14. |                                                      | CN <sup>-</sup> | 0.021 μM | THF                              | Nucleophilic Reaction | Bio Imaging                    |

|     |                                                                                     |                                                |                    |                       |                         |                   |
|-----|-------------------------------------------------------------------------------------|------------------------------------------------|--------------------|-----------------------|-------------------------|-------------------|
| 18. | 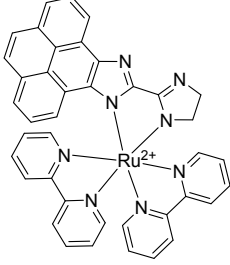   | CN <sup>-</sup>                                | 5.24 nM            | DMSO                  | Deprotonation           | _____             |
| 15. |    | H <sub>2</sub> S                               | 158 nM             | Water-DMSO (20:80)    | Reduction Reaction      | Bio Imaging       |
| 16. |    | H <sub>2</sub> S and NO                        | 2.6 μM and 0.12 μM | MeOH/Glycerin         | Reduction Reaction      | Bio Imaging       |
| 17. |   | H <sub>2</sub> S                               | _____              | EtOH/PBS Buffer (1:1) | Reduction Reaction      | Bio Imaging       |
| 20. |  | Fe <sup>3+</sup> and Acetate                   | 0.18 μM (Acetate)  | Water-CAN (1:1)       | Reversible Ring Opening | _____             |
| 22  |  | Fe <sup>2+</sup> /<br>Fe <sup>3+</sup> and PPI | 0.36 and 0.37 μM   | DMSO                  | Complexation            | _____             |
| 23. |  | Fe <sup>3+</sup> / PPI                         | 1.15 μM            | Bis-Tris Buffer       | Complexation            | _____             |
| 24. |  | Fe <sup>3+</sup> / PPI                         | 4.8 μM             | DMF/HEPES             | Complexation            | Real Sample water |



|     |  |                                                             |                                                                     |                      |                            |             |
|-----|--|-------------------------------------------------------------|---------------------------------------------------------------------|----------------------|----------------------------|-------------|
| 26. |  | Fe <sup>3+</sup>                                            | 6.6 μM                                                              | ACN/HEPES            | Reversible<br>Ring Opening | Real Sample |
| 27. |  | Fe <sup>3+</sup>                                            | 0.025 μM                                                            | EtOH/Water<br>(1:1)  | Reversible<br>Ring Opening | Bio Imaging |
| 28. |  | Cu <sup>2+</sup> / Fe <sup>3+</sup>                         | 0.98 μM<br>(Cu <sup>2+</sup> ) and<br>9.5 μM<br>(Fe <sup>3+</sup> ) | ACN                  | Complexation               | _____       |
| 34. |  | Fe <sup>3+</sup> / PPI                                      | 87.3 nM<br>and 12.5<br>nM                                           | DMSO:<br>Water (3:7) | Complexation               | Bio Imaging |
| 37. |  | Fe <sup>3+</sup> -CN <sup>-</sup><br>(Relay<br>Recognition) | 0.2 μM<br>(Fe <sup>3+</sup> ) and<br>0.26 nM<br>(CN <sup>-</sup> )  | Water:DMSO<br>(1:1)  | Complexation               | Strip test  |

|           |                                                                                   |                                                                               |                                                                                                |                     |                                                                                                                |                                                |
|-----------|-----------------------------------------------------------------------------------|-------------------------------------------------------------------------------|------------------------------------------------------------------------------------------------|---------------------|----------------------------------------------------------------------------------------------------------------|------------------------------------------------|
| 38.       | 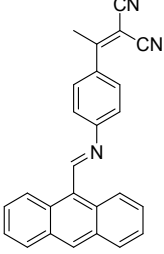 | CN <sup>-</sup> - Fe <sup>3+</sup><br>(Relay Recognition)                     | 8.11 μM<br>(CN <sup>-</sup> )                                                                  | ACN                 | Nucleophilic Reaction                                                                                          | Bio Imaging                                    |
| This Work |  | CN <sup>-</sup> /Fe <sup>3+</sup><br>(Relay Recognition) and H <sub>2</sub> S | 17.5 nM<br>(CN <sup>-</sup> ), 8.69 μM<br>(Fe <sup>3+</sup> ) and 8.1 μM<br>(H <sub>2</sub> S) | Water:DMSO<br>(1:9) | Reversible protonation<br>(CN <sup>-</sup> /Fe <sup>3+</sup> ) and nitro group reduction<br>(H <sub>2</sub> S) | Strip Test, Bio imaging and Zebrafish Imaging. |

**Table S2:** Quantum Yield of the CN<sup>-</sup>/Fe<sup>3+</sup> relay sensing process.

| Sl. No. | Species                                    | Absorption Maxima | Absorbance | Emission Area | Quantum Yield (ϕ) |
|---------|--------------------------------------------|-------------------|------------|---------------|-------------------|
| 1.      | Receptor                                   | 283               | 0.6756     | 16836         | 0.015             |
| 2.      | Receptor+CN <sup>-</sup>                   | 530               | 0.2316     | 331925        | 0.86              |
| 3.      | Receptor+CN <sup>-</sup> +Fe <sup>3+</sup> | 530               | 0.1        | 2038          | 0.013             |
| 4.      | Rhodamine B                                | 564               | 0.2573     | 406254        | 0.95              |
